# Supplementary material for: Highly Sensitive and Stretchable c-MWCNTs/PPy Embedded Multidirectional Strain Sensor Based on Double Elastic Fabric for Human Motion Detection
Source: MDPI journal article supplement (doi:10.3390/nano11092333), 2021-09-08
Supplement: s1 [file s1]

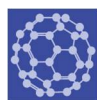

## SUPPORTING INFORMATION

# Highly Sensitive and Stretchable c-MWCNTs/PPy Embedded Multidirectional Strain Sensor Based on Double Elastic Fabric for Human Motion Detection

Huiying Shen <sup>1</sup>, Huizhen Ke <sup>2</sup>, Jingdong Feng <sup>1</sup>, Chenyu Jiang <sup>3</sup>, Qufu Wei <sup>1</sup> and Qingqing Wang <sup>1,\*</sup>

<sup>1</sup> Key Laboratory of Eco-textiles, Ministry of Education, Jiangnan University, Wuxi 214122, China; shenhuiying\_vicky@163.com (H.S.); 13101972828@163.com (J.F.); qfwei@jiangnan.edu.cn (Q.W.)

<sup>2</sup> Key Laboratory of Novel Functional Textile Fibers and Materials, Minjiang University, Fuzhou 350108, China; kehuizhen2013@163.com

<sup>3</sup> Department of Chemistry, North Carolina State University, Raleigh, NC 27695, USA; cjiang13@ncsu.edu

\* Correspondence: qqwang@jiangnan.edu.cn; Tel.: +86-150-5227-5367

## Table of Contents

**Figure S1.** SEM images of (a) cotton fibers loaded c-MWCNTs, (b) polyester fibers loaded c-MWCNTs, (c) cotton fibers loaded c-MWCNTs and PPy and (d) polyester fibers loaded c-MWCNTs and PPy.

**Figure S2.** The Plots of RRV versus strain for DEF/PPy sensor.

**Figure S3.** Strain-stress curves of pristine DEF: (a) The tensile tests machine, (b) The tensile curve of the warp direction and (c) The tensile curve of the weft direction.

**Table S1.** Comparison of the key performance indicators for different dual axis strain sensors.

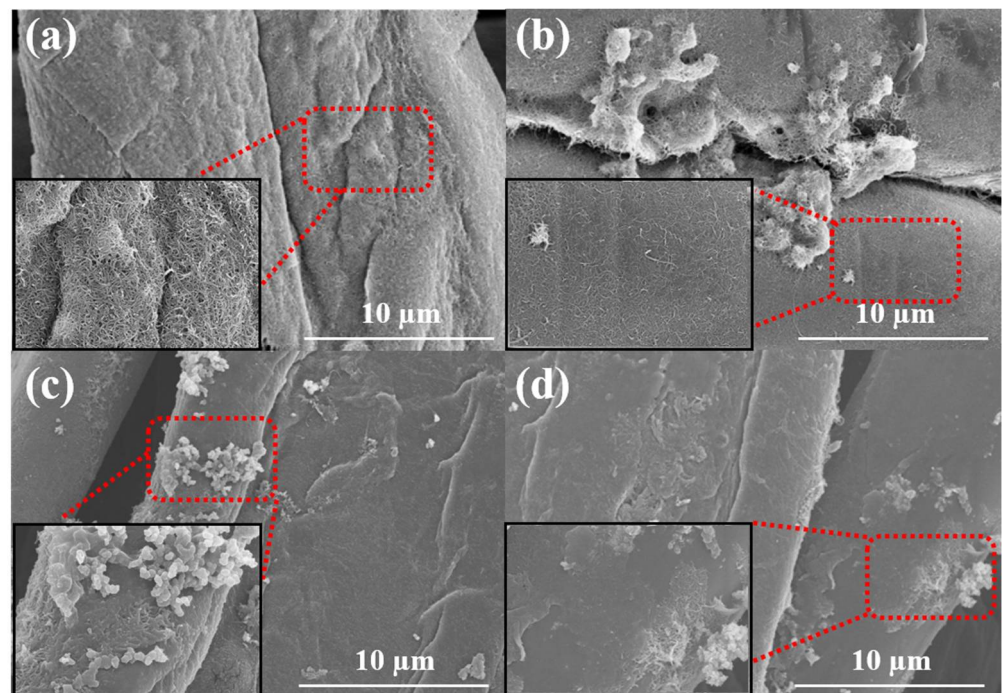

**Figure S1.** SEM images of (a) cotton fibers loaded c-MWCNTs, (b) polyester fibers loaded c-MWCNTs, (c) cotton fibers loaded c-MWCNTs and PPy and (d) polyester fibers loaded c-MWCNTs and PPy.

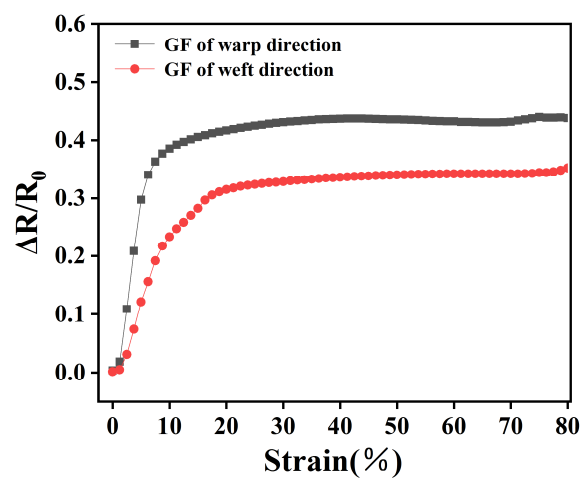

**Figure S2.** The Plots of RRV versus strain for DEF/PPy sensor.

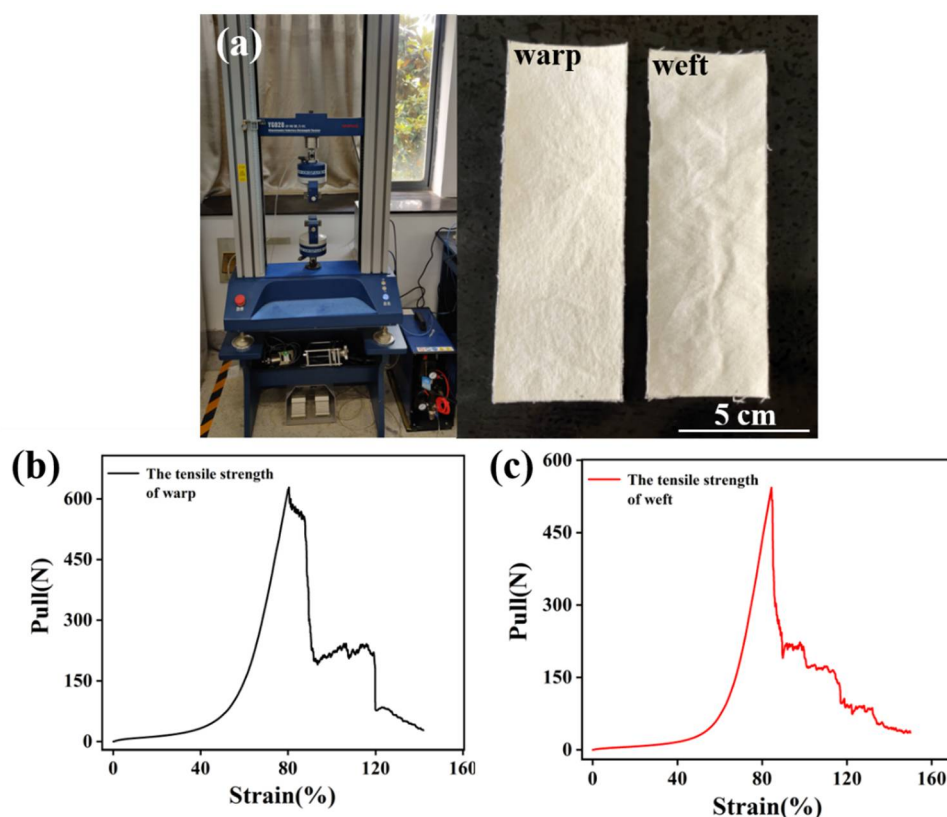

**Figure S3.** Strain-stress curves of pristine DEF: (a) The tensile tests machine, (b) The tensile curve of the warp direction and (c) The tensile curve of the weft direction.

**Table S1.** Comparison of the key performance indicators for different dual axis strain sensors.

| Materials                                    | Maximum strain (%) | GF         | Ref.      |
|----------------------------------------------|--------------------|------------|-----------|
| stiffness-variant stretchable substrate/AgNW | 60                 | 21.1       | [1]       |
| Aligned cellulose fibers/PDMS                | 5                  | 3.69–10.1  | [2]       |
| St-CCT/silicone                              | 42                 | 9.69–19.56 | [3]       |
| anisotropic carbon nanofiber films           | 30                 | 180        | [4]       |
| Anisotropic CellF–CNT/PDMS                   | 9                  | 1.19       | [5]       |
| AgNWs fiber electrodes/polymer matrix        | 30                 | 3.2        | [6]       |
| DEF/c-MWCNTs/Ppy                             | 80                 | 5.2        | This work |

[1] Ha, S.; Ha, S.; Jeon, M.B.; Cho, J.H.; Kim, J.M., Highly sensitive and selective multidimensional resistive strain sensors based on a stiffness-variant stretchable substrate. *Nanoscale* 2018, 10, 5105–5113.

[2] Chen, S.; Song, Y.; Ding, D.; Ling, Z.; Xu, F. Flexible and Anisotropic Strain Sensor Based on Carbonized Crepe Paper with Aligned Cellulose Fibers. *Adv. Funct. Mater.* 2018, 28, 1802547.

[3] Huang, P.; Yu X.; Li, Y.; Fu, Y.; Gan, D.; Taha, T.; Fu, Y.; Hu, N.; Fu, S. Architectural design of flexible anisotropic piezoresistive composite for multiple-loading recognition. *Compos. B. Eng.* 2020, 182, 107631.

[4] Lee, J.H.; Kim, J.; Liu, D.; Guo, F.; Shen, X.; Zheng, Q.; Jeon, S.; Kim, J.K., Highly Aligned, Anisotropic Carbon Nanofiber Films for Multidirectional Strain Sensors with Exceptional Selectivity. *Adv. Funct. Mater.* 2019, 29, 1901623.

[5] Wang, C.; Pan, Z.; Lv, W.; Liu, B.; Wei, J.; Lv, X.; Luo, Y.; Nishihara, H.; Yang, Q. A Directional Strain Sensor Based on Anisotropic Microhoneycomb Cellulose Nanofiber–Carbon Nanotube Hybrid Aerogels Prepared by Unidirectional Freeze Drying. *Small* 2019, 1805363.

[6] Cheng, Y.; Wang, R.; Zhai, H.; Sun, J. Stretchable electronic skin based on silver nanowire composite fiber electrodes for sensing pressure, proximity, and multidirectional strain. *Nanoscale* 2017, 9, 3834–3842.
